# Supplementary material
Source: MDPI journal article supplement (https://www.mdpi.com/2311-5637/9/11/927)
Supplement: s1 [file s1]

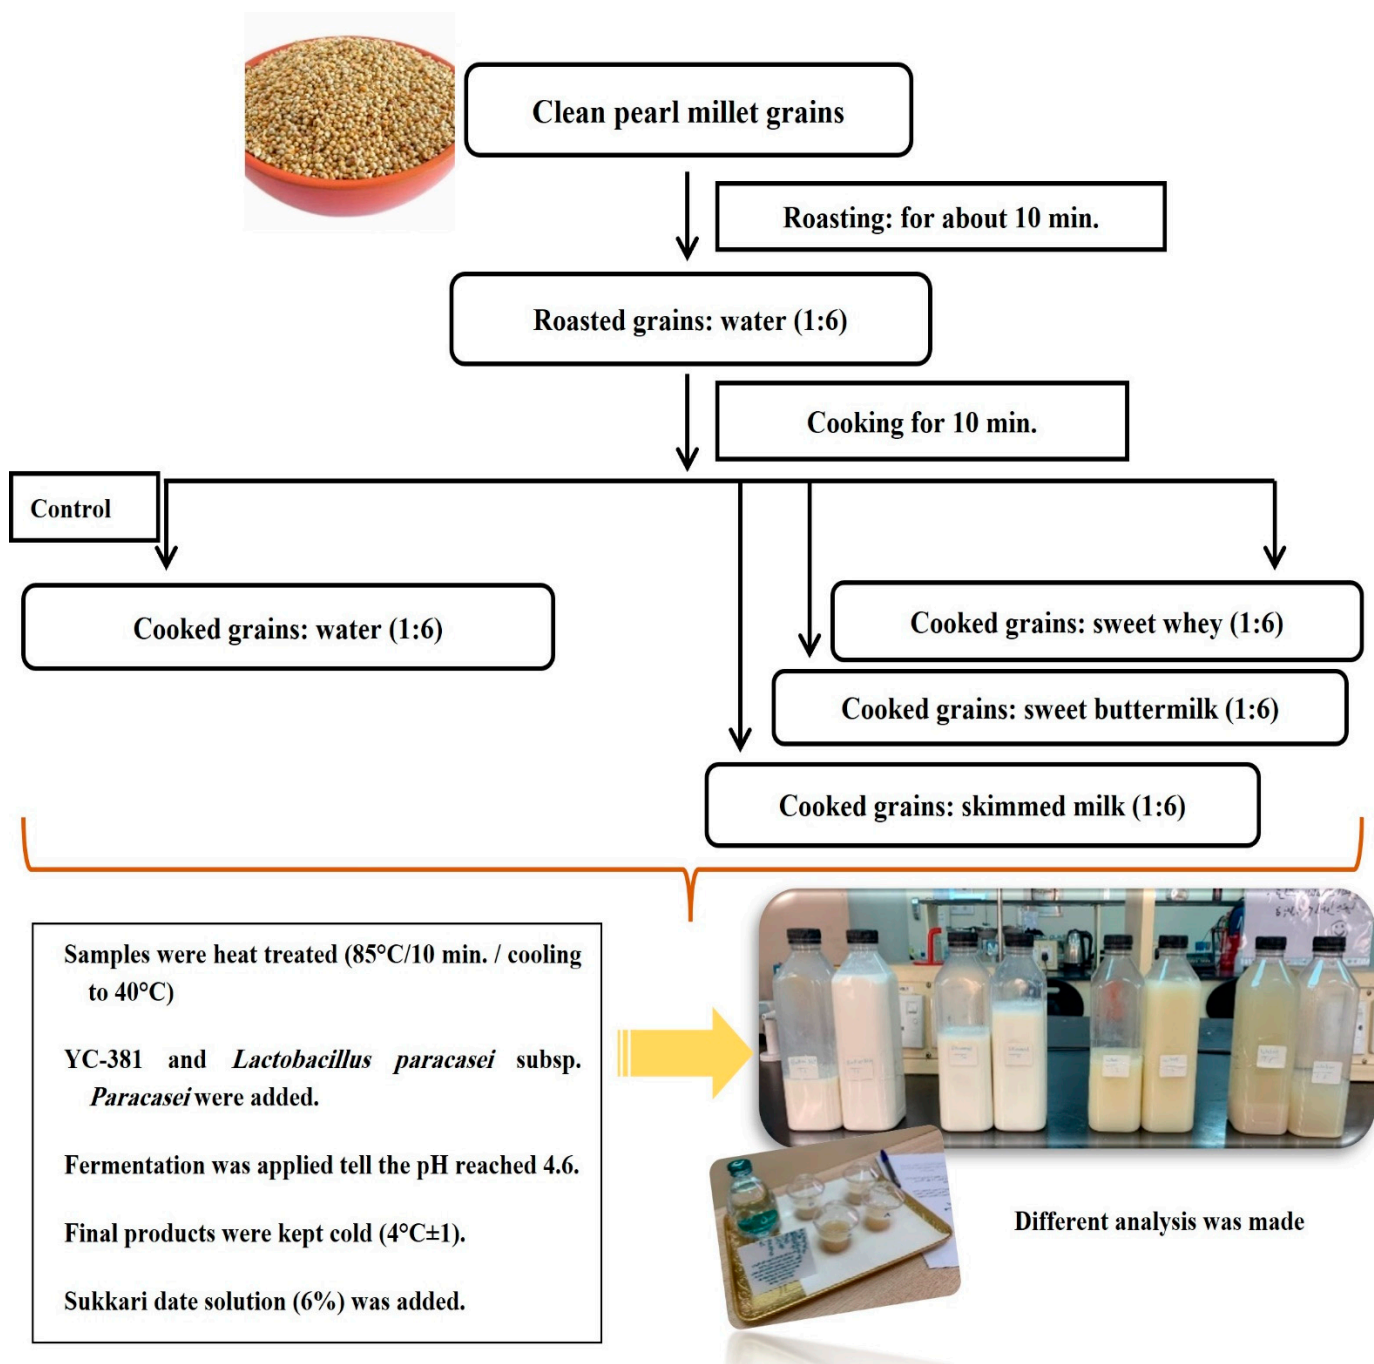

Figure S1. Summary of the fermented millet beverages preparation

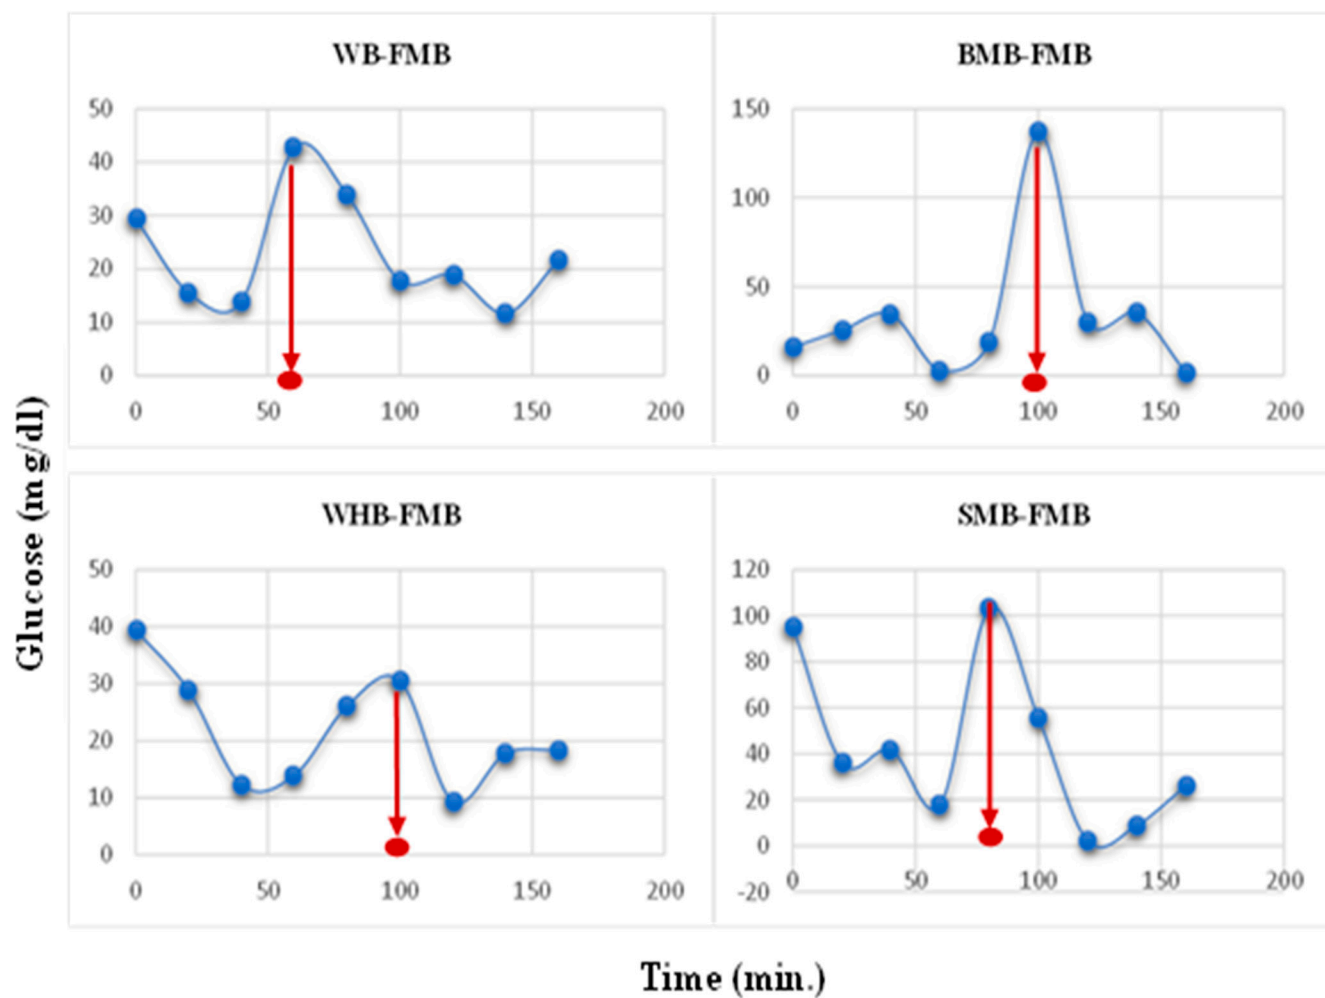

Figure S2. Hydrolysis curves plotted on 20 min time intervals during 160 min. of in vitro digestion.
